# Supplementary material
Source: Springer Nature journal article supplement (https://www.springermedizin.de/resource/supplementary/12877_2013_925_MOESM1_ESM.pdf/9440438)

Model 1

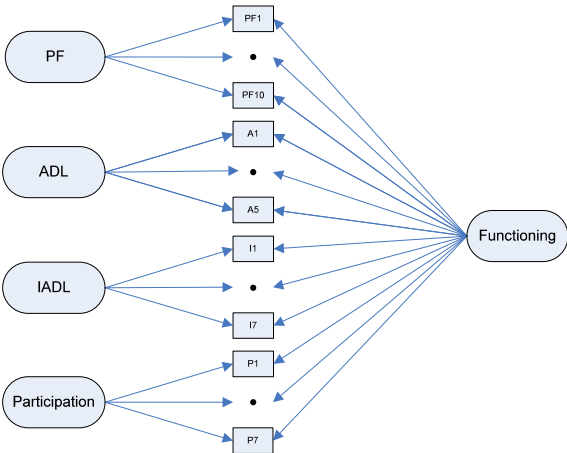

Model 2

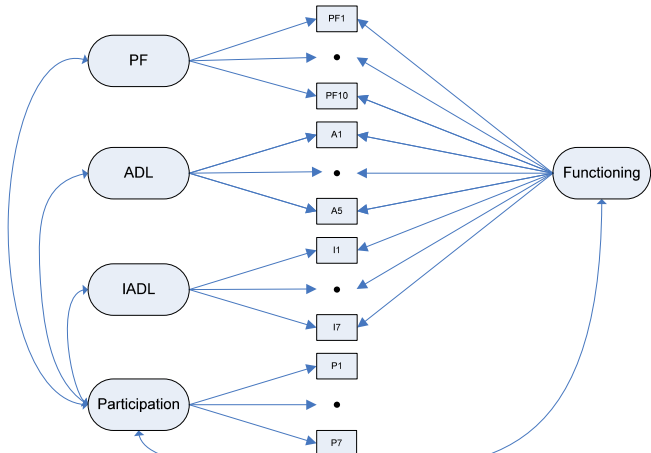

Supplement: MOESM1 [file 9440438]
